# Supplementary material for: Interferon-alpha competing endogenous RNA network antagonizes microRNA-1270
Source: Cell Mol Life Sci. 2015 Mar 7;72(14):2749–61. doi: 10.1007/s00018-015-1875-5 (PMC4477080; doi:10.1007/s00018-015-1875-5)
Supplement: Supplementary file 3 — Supplementary material 3 (PDF 69 kb) [file 18_2015_1875_MOESM3_ESM.pdf]

**Supplementary Table 4** Base pairing of miR-1270 with the putative MRE-1270s on IFN- $\alpha$ 1 AS/exons 0.1 and 1.1.

|                                                |                                        |                             |  |
|------------------------------------------------|----------------------------------------|-----------------------------|--|
| Position: -3101 - -3077 (exon 0.1)             |                                        | $\Delta G$ : -18.8 kcal/mol |  |
|                                                | 5' UU GGCA G 3'                        |                             |  |
|                                                | CAC GU UUCUG AUCUUUAG                  |                             |  |
|                                                | GUG CG AAGGU UAGAGGUC                  |                             |  |
| MiR-1270                                       | 3' U U AG A 5'                         |                             |  |
| Position: -121 - -101 (exon 1.1/DSR)           |                                        | $\Delta G$ : -16.5 kcal/mol |  |
|                                                | 5' A C AU A 3'                         |                             |  |
|                                                | AUAUA C CUUU UCUCUA                    |                             |  |
|                                                | UGUGU G GAAG AGAGGU                    |                             |  |
| MiR-1270                                       | 3' C A GUAU C 5'                       |                             |  |
| Position: 556 - 507 (exon 1.1/stop-SL2 region) |                                        | $\Delta G$ : -21.2 kcal/mol |  |
|                                                | 5' G AAG UGUUUU CUGUCAGAUAGAGA AU A 3' |                             |  |
|                                                | GCAC GGC UCUUCU GUG UCUUCGG            |                             |  |
| MiR-1270                                       | 3' UGUG UCG AGAAGG UAU AGAGGUC 5'      |                             |  |
| Position: 436 - 412 (exon 1.1/SL2R)            |                                        | $\Delta G$ : -28.8 kcal/mol |  |
|                                                | 5' 5' C G A A C 3'                     |                             |  |
|                                                | ACACAG CUUCCA GUC UUCAG                |                             |  |
|                                                | UGUGUC GAAGGU UAG AGGUC                |                             |  |
| MiR-1270                                       | 3' GA A 5'                             |                             |  |
| Position: 186 - 160 (exon 1.1/SL1-ATG region)  |                                        | $\Delta G$ : -23.6 kcal/mol |  |
|                                                | 5' 5'A CA G C A G 3'                   |                             |  |
|                                                | GCAU AG UC UCC UGUU UCCAG              |                             |  |
|                                                | UGUG UC AG AGG AUAG AGGUC              |                             |  |
| MiR-1270                                       | 3' G A U 5'                            |                             |  |
